# Supplementary material
Source: Springer Nature journal article supplement (https://www.springermedizin.de/resource/supplementary/12936_2012_2609_MOESM6_ESM.pdf/9543310)

A

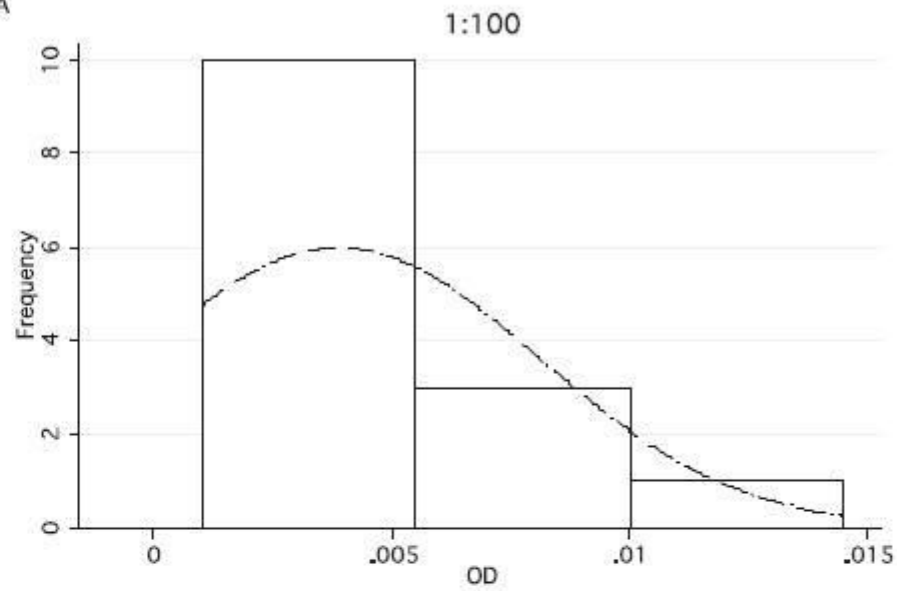

B

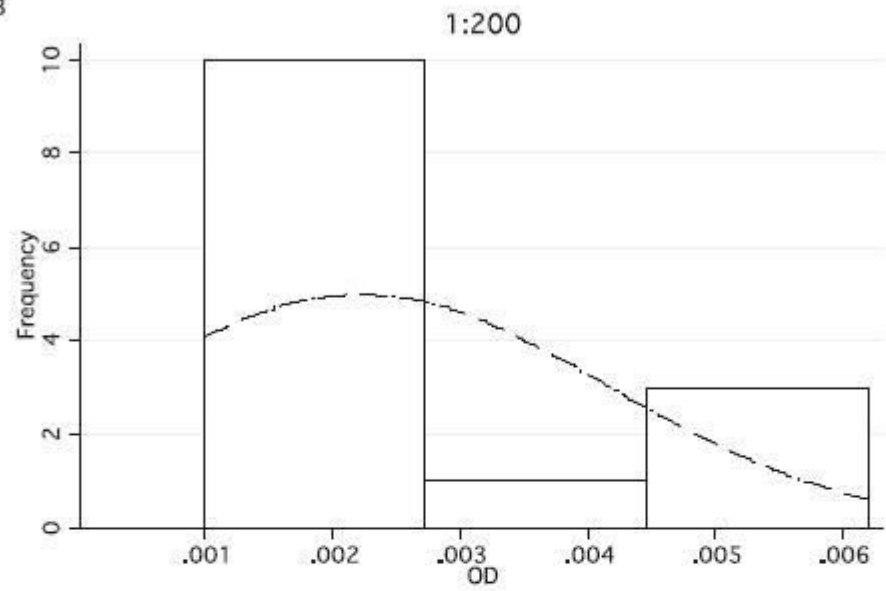

C

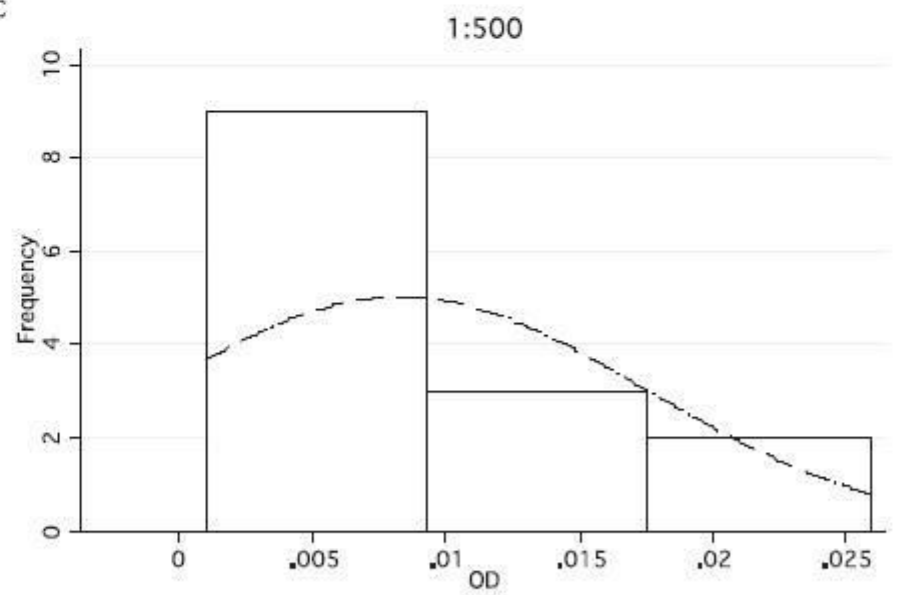

D

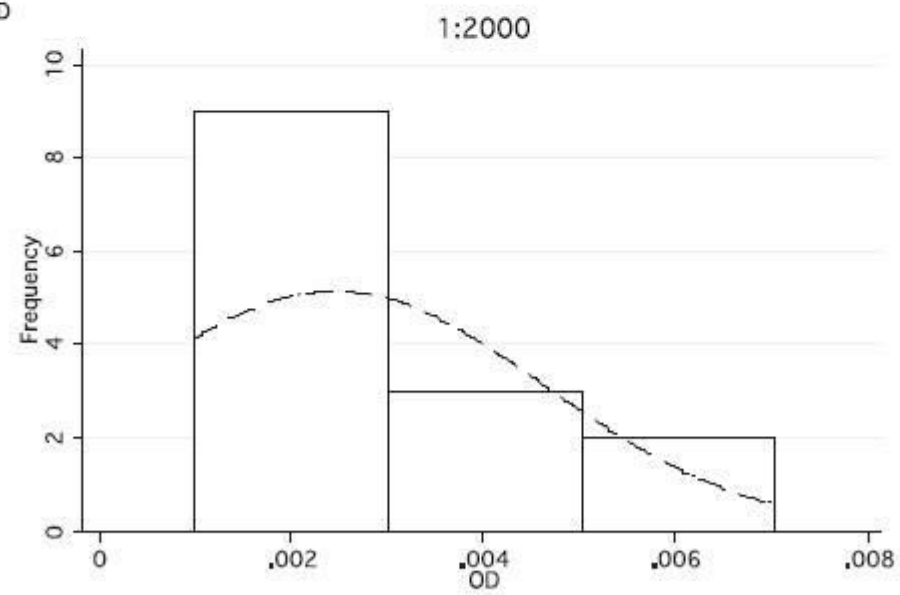

Supplement: MOESM6 [file 9543310]
